# Supplementary material
Source: publisher site journal article supplement (http://degruyter.com/publication/journal_key/NANOPH/downloadAsset/NANOPH_Article_Processing_Charges.pdf)
Supplement: Supplementary file 1 [file NANOPH_Article_Processing_Charges.pdf]

# Article Processing Charges

EFFECTIVE JANUARY 2023

---

In order to sustain the production of our fully-refereed open access journal, each article accepted for publication in *Nanophotonics* is subject to an **Article Processing Charge of €2500**. This fee is used to cover the costs of the peer-review process, professional typesetting and copyediting, as well as online hosting, long-term preservation, and extensive promotion to potential readers.

Editors and reviewers are not involved in author payment process and do not discuss charges with authors. The ability to pay does not influence whether or not a manuscript is accepted for publication.

Information regarding payment of these charges will be provided following acceptance for publication. Inquiries concerning Article Processing Charges should be addressed to the Managing Editor (see contact details below). Article Processing Charges are collected via RightsLink system (provided by Copyright Clearance Center). The payment can be made in EUR, USD or GBP, and may be subject to VAT when applicable.

## Waiver Policies

If the submitting author is affiliated with an organization which has [an open access agreement](#) with De Gruyter, the article processing charges (APCs) may be covered or discounted.

In addition, *Nanophotonics* and De Gruyter are committed to supporting researchers in emerging nations to share their research with a global audience. APCs may be waived for authors who work for institutions in developing countries (countries [classified by the World Bank](#) as low-income and lower-middle-income economies).

Moreover, all authors can apply for a discount or waiver during the submission process. Authors are asked to contact the Managing Editor before, or straight after, submitting their article.

## Funding Opportunities

Authors who are looking for funds to support the payment of Article Processing Charges have a number of options to consider. For details, visit [our website](#).

## Contact Information

Publishing Editor

**Drs. Ing Dennis Couwenberg**

E-mail: [dcouwenberg@nanophotonics-journal.com](mailto:dcouwenberg@nanophotonics-journal.com)

WeChat ID: dcouwenb

Managing Editor

**Ms. Tara Dorrian**

E-mail: [tdorrian@nanophotonics-journal.com](mailto:tdorrian@nanophotonics-journal.com)
